# Supplementary material for: Description of the Microsporidian Parasite, Heterosporis sutherlandae n. sp., Infecting Fish in the Great Lakes Region, USA
Source: PubMed Central journal article supplement (PMC4526549; doi:10.1371/journal.pone.0132027), 2015-08-05

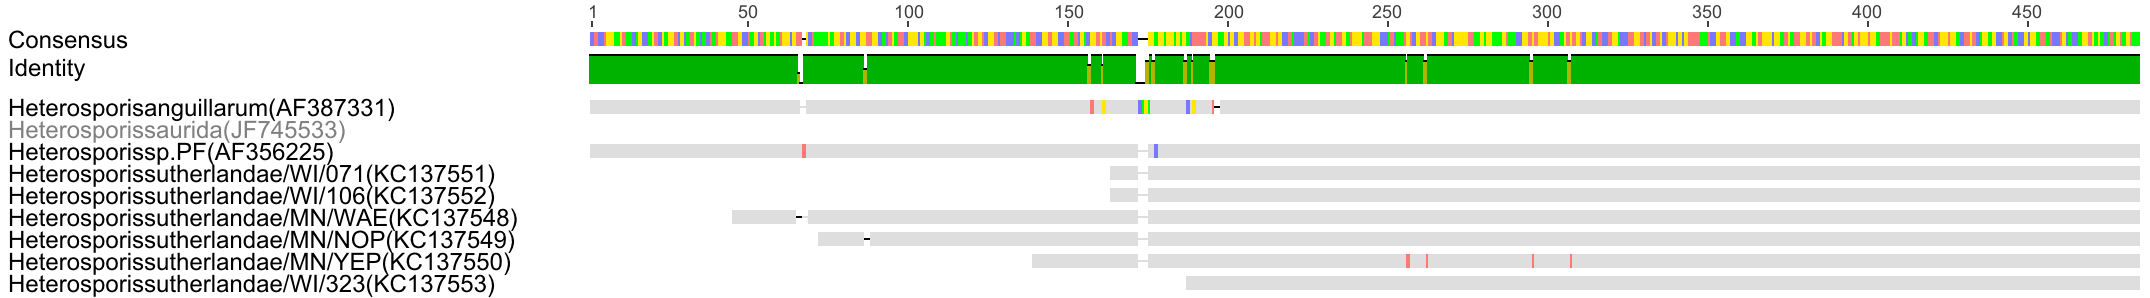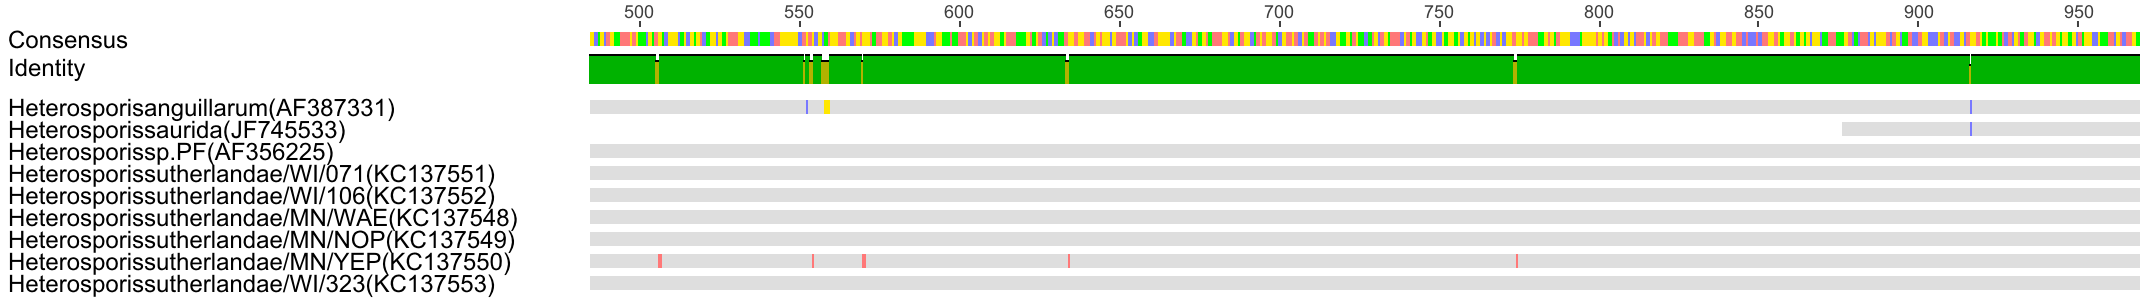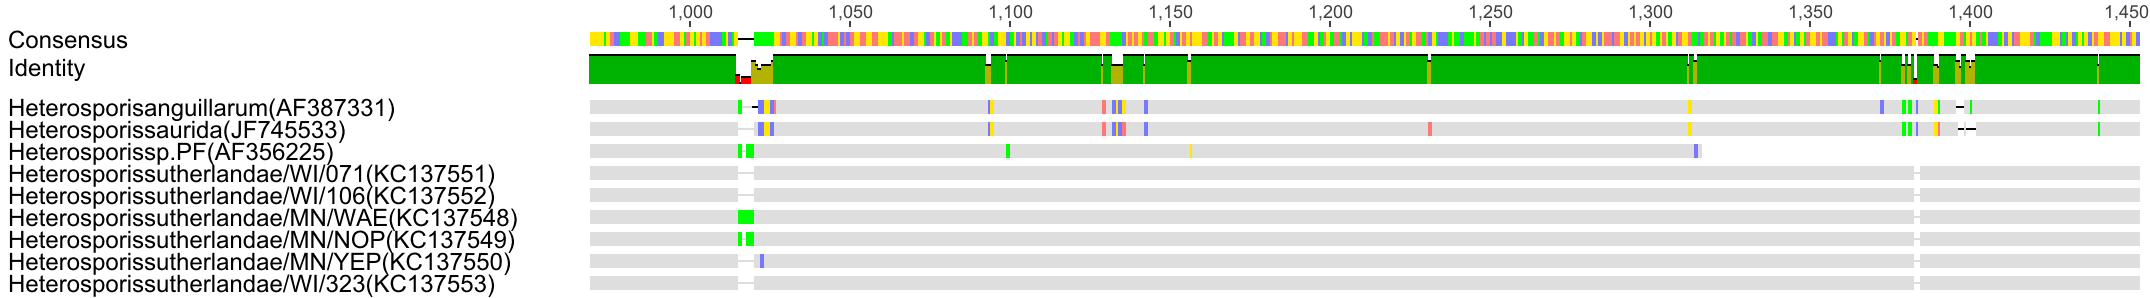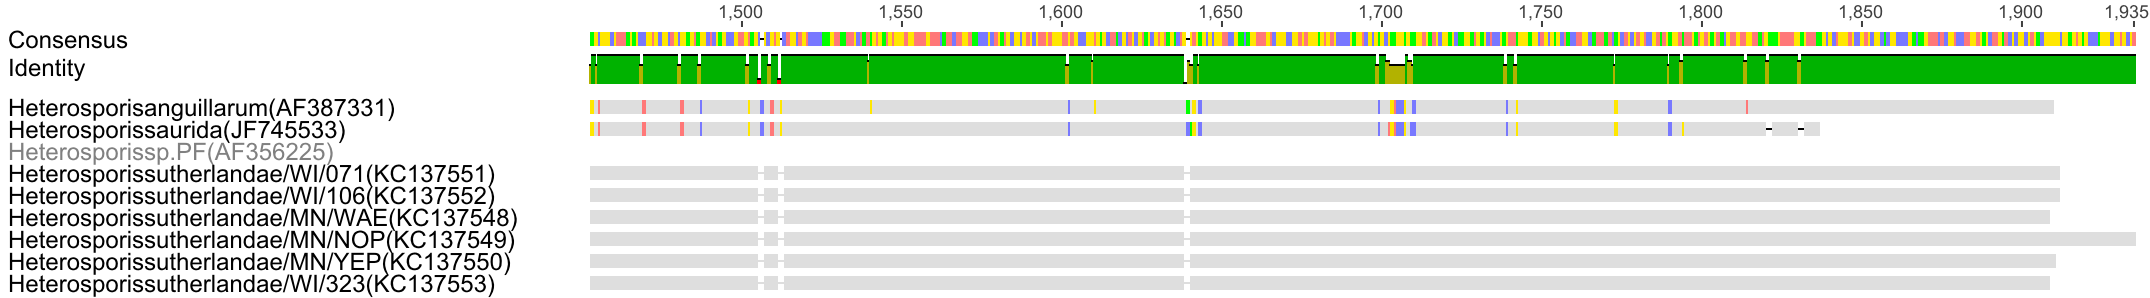

Supplement: pone.0132027.s001.pdf [file pone.0132027.s001.pdf]
